# Supplementary material for: Efficacy of sacubitril/valsartan on improving clinical symptoms in patients with acute myocardial infarction complicated with heart failure: a retrospective study
Source: PeerJ journal article supplement (doi:10.7717/peerj.18873), 2025-02-11
Supplement: Codebook.docx [file Codebook.docx]

**Codebook**

|  | **Variables names** | **Meaning** | **Notes** |
| --- | --- | --- | --- |
| 1 | age | "Age (years)" |  |
| 2 | gender | "Gender" |  |
| 3 | gender_c | "Gender recode" | 1 "male"  0 "female" |
| 4 | marriage | "Marriage status" |  |
| 5 | marriage_c | "Marriage status recode" | 0 "unmarried"  1 "married"  2 "divorced"  3 "widowed" |
| 6 | marriage_c1 | "Marriage status combination" | 0 "other"  1 "married" |
| 7 | hypertension | "Whether have the history of hypertension" | 0 "no"  1 "yes" |
| 8 | diabetes | "Whether have the history of diabetes" | 0 "no"  1 "yes" |
| 9 | height | "Height (cm)" |  |
| 10 | weight | "Weight (kg)" |  |
| 11 | BMI | "Body mass index (kg/m2)" |  |
| 12 | smoking | "Whether smoke" | 0 "no"  1 "yes" |
| 13 | drinking | "Whether drink" | 0 "no"  1 "yes" |
| 14 | hospitalizationtimes | "Length of hospitalization (days)" |  |
| 15 | maindiagnosed | "The diagnosis at the time of discharge" |  |
| 16 | maindiagnosed_c | "The diagnosis at the time of discharge recode" | 0 "Unclassified: Subacute myocardial infarction, Myocardial infarction, Acute diaphragmatic myocardial infarction, Acute small area myocardial infarction, Acute apical myocardial infarction" 1 "Inferior myocardial infarction: Acute inferior right ventricular myocardial infarction, Acute inferior myocardial infarction, Acute inferior posterior myocardial infarction"  2 "Anterior myocardial infarction: Acute anterior myocardial infarction, Acute transmural anterior myocardial infarction" |
| 17 | SV | "Whether use SV" |  |
| 18 | SV_c | "Whether use SV recode" | 0 "no"  1 "yes" |
| 19 | SVdosing | "The dosage of the SV" |  |
| 20 | AECI | "Whether use AECI" |  |
| 21 | AECI_c | "Whether use AECI recode" | 0 "no"  1 "yes" |
| 22 | AECIdosing | "The dosage of the AECI" |  |
| 23 | SBP_ad | "Systolic blood pressure at admission (mm Hg)" |  |
| 24 | DBP_ad | "Diastolic blood pressure at admission (mm Hg)" |  |
| 25 | SBP_dis | "Systolic blood pressure at discharge (mm Hg)" |  |
| 26 | DBP_dis | "Diastolic blood pressure at discharge (mm Hg)" |  |
| 27 | redblood_ad | "Red blood cells at admission (mcl)" |  |
| 28 | whiteblood_ad | "White blood cells at admission (mcl)" |  |
| 29 | hemoglobin_ad | "Hemoglobin at admission (gm/dL)" |  |
| 30 | platelets_ad | "Platelets at admission (mcL)" |  |
| 31 | triglycerides_ad | "Triglycerides at admission (mmol/L)" |  |
| 32 | cholesterol_ad | "Total Cholesterol at admission (mmol/L)" |  |
| 33 | HDL_ad | "High-Density Lipoproteinat admission (mmol/L)" |  |
| 34 | LDL_ad | "Low-Density Lipoprotein at admission (mmol/L) " |  |
| 35 | creatinine_ad | Creatinine at admission (mmol/L)" |  |
| 36 | bloodglucose_ad | "Blood Glucose at admission (mmol/L) " |  |
| 37 | EF_ad | "Ejection Fraction at admission (%)" |  |
| 38 | LVEDD_ad | "Left Ventricular End-Diastolic Dimension at admission (mm) " |  |
| 39 | NTproBNP_ad | "NT-proBNP at admission (pg/ml)" |  |
| 40 | NTproBNP_dis | "NT-proBNP at discharge (pg/ml)" |  |
| 41 | NTproBNP_drop | "Difference between admission and discharge for NT-proBNP (pg/ml)" |  |
| 42 | symptomsimprove_ad | "Whether symptoms of wheezing and dyspnea improved during the hospital" | 0 "no"  1 "yes" |
| 43 | symptomsimprove_dis | "Whether symptoms of wheezing and dyspnea improved after discharge from the hospital" | 0 "no"  1 "yes" |
| 44 | readmission | "Any re-hospitalization for heart disease within a year" | 0 "no"  1 "yes" |
| 45 | followup | "Whether to review NTproBNP or ejection fraction or left ventricular end-diastolic dimension" | 0 "no"  1 "yes" |
| 46 | NTproBNP_fu | "NT-proBNP at follow up (pg/ml)" |  |
| 47 | EF_fu | "Ejection Fraction at follow up (%)" |  |
| 48 | LVEDD_fu | "Left Ventricular End-Diastolic Dimension at follow up (mm)" |  |
