# Supplementary material for: Efficacy of sacubitril/valsartan on improving clinical symptoms in patients with acute myocardial infarction complicated with heart failure: a retrospective study
Source: PeerJ journal article supplement (doi:10.7717/peerj.18873), 2025-02-11
Supplement: STROBE.doc [file STROBE.doc]

STROBE Statement—Checklist of items that should be included in reports of ***cohort studies***

|  | Item No | Recommendation | Line  No. | Relevant text from |
| --- | --- | --- | --- | --- |
| **Title and abstract** | 1 | (*a*) Indicate the study’s design with a commonly used term in the title or the abstract | 1-3 | Efficacy of sacubitril/valsartan on improving clinical symptoms in patients with acute myocardial infarction complicated with heart failure |
| (*b*) Provide in the abstract an informative and balanced summary of what was done and what was found | 42-49 | The study included 31 patients in the S/V group and 57 in the ACEIs group in total. At baseline, no significant differences were observed in demographic, lifestyle, and medical history between the two groups. While S/V group patients presented with more severe baseline renal impairment and cardiac dysfunction, both treatment groups showed no significant difference in NT-proBNP levels from admission to discharge, and 100% of patients in the S/V group reported improvement in dyspnea symptoms, compared to 94.74% in the ACEIs group. Blood pressure reductions were more pronounced in the S/V group. The one-year follow-up showed no significant differences in readmission rates or sustained symptom improvement between groups. |
| Introduction | | |  |  |
| Background/rationale | 2 | Explain the scientific background and rationale for the investigation being reported | 82-86  109-114 | Sacubitril, a prodrug, prolongs the activity of the natriuretic peptides, by inhibiting neprilysin, an enzyme responsible for the degradation of various vasoactive peptides including natriuretic peptides (Mangiafico et al., 2013). Valsartan, on the other hand, functions as an antagonist of the angiotensin II type 1 receptor, leading to inhibition of the RAAS (Wang et al., 2015; Sauer et al., 2019).  However, for patients with AMI complicated by HF, there is currently very limited clinical research data in China on the efficacy of S/V and ACEIs. Despite advancements in treatment strategies and healthcare, evidence indicates that the risk of mortality significantly increases for HF patients with AMI history (Gerber et al., 2016). Current treatment strategies often focus on acute management of AMI and may not adequately address the subsequent development or exacerbation of HF. |
| Objectives | 3 | State specific objectives, including any prespecified hypotheses | 118-120 | Therefore, this study aims to investigate the improvement in clinical symptoms of patients with AMI complicated by HF through early application of S/V, providing insights into potentially improving clinical outcomes in this vulnerable population. |
| Methods | | |  |  |
| Study design | 4 | Present key elements of study design early in the paper | 124 | This is a single-center mixed method clinical study. |
| Setting | 5 | Describe the setting, locations, and relevant dates, including periods of recruitment, exposure, follow-up, and data collection | 124-126 | Between January 2021 and December 2021, all patients with AMI complicated with HF at Tangshan Gongren Hospital were retrospectively enrolled. They were followed up prospectively one year after discharge from the hospital. |
| Participants | 6 | (*a*) Give the eligibility criteria, and the sources and methods of selection of participants. Describe methods of follow-up | 136-139  154-156 | The inclusion criteria were age >18 years, meeting the diagnostic criteria for AMI complicated with AHF. Exclusion criteria were other severe cardiovascular diseases that may affect treatment efficacy, renal failure, hypotension, cardiogenic shock or malignant arrhythmias, and bacterial, viral, or other pathogen infections.  Follow-up assessments, including tracking of readmission rates and changes in symptomatology, were conducted through scheduled clinic visits or telephone interviews at regular intervals over a one-year period following discharge. |
| (*b*)For matched studies, give matching criteria and number of exposed and unexposed | Not applicable |  |
| Variables | 7 | Clearly define all outcomes, exposures, predictors, potential confounders, and effect modifiers. Give diagnostic criteria, if applicable | 158-189 | Outcome measurement  In evaluating the impact of S/V versus ACEIs in patients with AMI complicated by HF, this study assessed two primary endpoints:…………within one year of discharge. This rate is expressed as a percentage and calculated by dividing the number of patients readmitted by the total number of patients in the cohort. |
| Data sources/ measurement | 8* | For each variable of interest, give sources of data and details of methods of assessment (measurement). Describe comparability of assessment methods if there is more than one group | 158-189 | Outcome measurement  In evaluating the impact of S/V versus ACEIs in patients with AMI complicated by HF, this study assessed two primary endpoints:…………within one year of discharge. This rate is expressed as a percentage and calculated by dividing the number of patients readmitted by the total number of patients in the cohort. |
| Bias | 9 | Describe any efforts to address potential sources of bias | 144-156 | Data collection  Baseline characteristics were collected through structured interviews and medical record reviews, encompassing demographic information,……over a one-year period following discharge. |
| Study size | 10 | Explain how the study size was arrived at | 209-212 | During January 2021 and December 2021, the hospital was able to treat 376 patients with AMI complicated with HF. After excluding patients with missing medications, missing NT-proBNP, and concurrent use of ACEIs and S/V, a final analysis of 88 patients was performed and followed up one year after discharge (Fig. 1). |
| Quantitative variables | 11 | Explain how quantitative variables were handled in the analyses. If applicable, describe which groupings were chosen and why | 193-200 | Prior to statistical testing, Levene’s Test and Shapiro–Wilk test was employed to assess whether the two groups exhibited equal variances and whether the data followed a normal distribution. Two-sample t-tests were utilized to compare baseline, pre- and post-medication, and follow-up differences between groups when both Levene’s Test and Shapiro–Wilk test indicated p-values greater than 0.05. For self-matching data, Paired Samples t-tests were employed for within groups differences. Alternatively, Wilcoxon rank-sum test and Wilcoxon Signed Rank Test were utilized to measure between-group and within-group differences, respectively, when normality assumptions were violated, or variances were unequal. |
| Statistical methods | 12 | (*a*) Describe all statistical methods, including those used to control for confounding | 193-201 | Prior to statistical testing, Levene’s Test and Shapiro–Wilk test was employed to assess whether the two groups exhibited equal variances and whether the data followed a normal distribution. Two-sample t-tests were utilized to compare baseline, pre- and post-medication, and follow-up differences between groups when both Levene’s Test and Shapiro–Wilk test indicated p-values greater than 0.05. For self-matching data, Paired Samples t-tests were employed for within groups differences. Alternatively, Wilcoxon rank-sum test and Wilcoxon Signed Rank Test were utilized to measure between-group and within-group differences, respectively, when normality assumptions were violated, or variances were unequal. Analysis of categorical variables was conducted using the χ^2 test. |
| (*b*) Describe any methods used to examine subgroups and interactions | Not applicable |  |
| (*c*) Explain how missing data were addressed | Figure 1 |  |
| (*d*) If applicable, explain how loss to follow-up was addressed | Table 1 | d represents 1-person missing data for certain variable, and e represents 29 persons missing data for certain variable. |
| (*e*) Describe any sensitivity analyses | Not applicable |  |
| Results | | |  |  |
| Participants | 13* | (a) Report numbers of individuals at each stage of study—eg numbers potentially eligible, examined for eligibility, confirmed eligible, included in the study, completing follow-up, and analysed | Figure 1 |  |
| (b) Give reasons for non-participation at each stage | Figure 1 |  |
| (c) Consider use of a flow diagram | Figure 1 |  |
| Descriptive data | 14* | (a) Give characteristics of study participants (eg demographic, clinical, social) and information on exposures and potential confounders | Table 1  212-239 | As shown in Table 1, the study comprised 31 individuals in the S/V group with an average age of 62.29 years (SD 13.54)……ardiac function-associated indexes show a more severe cardiac dysfunction in the S/V group at baseline. |
| (b) Indicate number of participants with missing data for each variable of interest | Table1, Table 2, Table 3 |  |
| (c) Summarise follow-up time (eg, average and total amount) | 212 | followed up one year after discharge |
| Outcome data | 15* | Report numbers of outcome events or summary measures over time | Table1, Table 2, Table 3 |  |
| Main results | 16 | (*a*) Give unadjusted estimates and, if applicable, confounder-adjusted estimates and their precision (eg, 95% confidence interval). Make clear which confounders were adjusted for and why they were included | Not applicable |  |
| (*b*) Report category boundaries when continuous variables were categorized | Not applicable |  |
| (*c*) If relevant, consider translating estimates of relative risk into absolute risk for a meaningful time period | Not applicable |  |
| Other analyses | 17 | Report other analyses done—eg analyses of subgroups and interactions, and sensitivity analyses | Not applicable |  |
| Discussion | | |  |  |
| Key results | 18 | Summarise key results with reference to study objectives | 282-289 | This single-center retrospective clinical study aims to investigate the clinical efficacy of S/V compared to ACEIs in patients with AMI complicated by HF. While the results from landmark trials like PARADIGM-HF and PIONEER-HF have been pivotal in establishing the role of S/V in heart failure management, the results of our study did not demonstrate a statistically significant change in NT-proBNP levels from admission to discharge within both treatment groups and a significant improvement in dyspnea symptoms between two groups, suggesting that the S/V and ACEIs administration may not be efficacious in patients with AMI complicated by HF. |
| Limitations | 19 | Discuss limitations of the study, taking into account sources of potential bias or imprecision. Discuss both direction and magnitude of any potential bias | 352-365 | Our research, while providing valuable insights into the treatment of AMI complicated by HF, does contain several limitations. Firstly, the study was not a randomized control trial. The significant differences in baseline renal function and cardiac dysfunction between the two groups have introduced a selection bias. Secondly, the design of a single-center study introduces the lack of the generalizability of the results. The data was derived from a single hospital can only reflect the specific Chinese patient population, and physician practices of that region, which may not be representative of broader clinical settings. Thirdly, 88 individuals were included in baseline and only 19 people were successfully followed up after one year. The relatively small sample size could reduce the statistical power. While the short follow-up period limits the capacity to observe and report on long-term outcomes, which are particularly salient in chronic conditions like HF. Therefore, future research should aim to include larger, multi-center trials with longer follow-up periods to robustly assess the long-term effectiveness of S/V versus ACEIs across varied clinical environments. Moreover, studies designed to stratify patients based on baseline characteristics should be conducted to provide insight into personalized medicine approaches. |
| Interpretation | 20 | Give a cautious overall interpretation of results considering objectives, limitations, multiplicity of analyses, results from similar studies, and other relevant evidence | 291-350 | NT-proBNP serves as a direct indicator of the physiological…… with AMI complicated by HF, utilizing S/V in managing disease progression and improving prognosis may be a critical component. |
| Generalisability | 21 | Discuss the generalisability (external validity) of the study results | 355-358 | Secondly, the design of a single-center study introduces the lack of the generalizability of the results. The data was derived from a single hospital can only reflect the specific Chinese patient population, and physician practices of that region, which may not be representative of broader clinical settings. |
| Other information | | |  |  |
| Funding | 22 | Give the source of funding and the role of the funders for the present study and, if applicable, for the original study on which the present article is based |  |  |

*Give information separately for exposed and unexposed groups.

**Note:** An Explanation and Elaboration article discusses each checklist item and gives methodological background and published examples of transparent reporting. The STROBE checklist is best used in conjunction with this article (freely available on the Web sites of PLoS Medicine at http://www.plosmedicine.org/, Annals of Internal Medicine at http://www.annals.org/, and Epidemiology at http://www.epidem.com/). Information on the STROBE Initiative is available at http://www.strobe-statement.org.
